# Supplementary material for: Non-specific pain and 30-day readmission in acute coronary syndromes: findings from the TRACE-CORE prospective cohort
Source: Springer Nature journal article supplement (doi:10.1186/s12872-021-02195-z), 2021-08-09
Supplement: MOESM1 [file 19554394]

**Supplement 1. Comparison of characteristics of patients analyzed in this study and all TRACE-CORE participants**

**Table S1-1. Patient characteristics for this study (N=787) and the full TRACE-CORE population (N=2174): TRACE-CORE, 2011-2013**

| Characteristic         | This Study (N = 787) | Full TRACE-CORE population (N = 2174) |
|------------------------|----------------------|---------------------------------------|
| Age (mean, y)          | 62.0                 | 61.3                                  |
| Female (%)             | 29.9                 | 33.5                                  |
| Non-Hispanic white (%) | 94.9                 | 81.0                                  |
| Education              |                      |                                       |
| ≤High school           | 36.3                 | 46.5                                  |
| Some college           | 30.6                 | 28.9                                  |
| ≥College graduate      | 33.0                 | 24.7                                  |
| Live Alone             | 20.1                 | 21.9                                  |
| Low Health Literacy    | 29.0                 | 36.1                                  |
| Heavy Drinker          | 9.4                  | 9.6                                   |
| Current Smoker         | 20.6                 | 23.3                                  |

The statistics for patient characteristics for all the TRACE-CORE participants were calculated by using information from a published TRACE-CORE paper.<sup>1</sup>

References:

1. Goldberg RJ, Saczynski JS, McManus DD, et al. Characteristics of contemporary patients discharged from the hospital after an acute coronary syndrome. *The American journal of medicine*. 2015;128(10):1087-1093.
