# Supplementary material for: Non-specific pain and 30-day readmission in acute coronary syndromes: findings from the TRACE-CORE prospective cohort
Source: Springer Nature journal article supplement (doi:10.1186/s12872-021-02195-z), 2021-08-09
Supplement: MOESM3 [file 19554394]

**Supplement 3. Sensitivity analyses, using patients not self-reporting chest pain (N=530)**

**Table S3-1. Patient characteristics at baseline, by pain self-reported one month after discharge: TRACE-CORE, 2011-2013**

| Variable, n (%) or mean [SD] | All Patients   | Categories of Self-Reported Pain after Discharge |                                       |                                           |               | P value <sup>1</sup> |
|------------------------------|----------------|--------------------------------------------------|---------------------------------------|-------------------------------------------|---------------|----------------------|
|                              |                | No pain                                          | Mild-moderate pain, documented in EHR | Mild-moderate pain, NOT documented in EHR | Severe pain   |                      |
|                              | <b>N = 530</b> | <b>N = 255</b>                                   | <b>N = 60</b>                         | <b>N =191</b>                             | <b>N = 24</b> |                      |
|                              | N (%)          | N (%)                                            | N (%)                                 | N (%)                                     | N (%)         |                      |
| Age                          |                |                                                  |                                       |                                           |               | 0.24                 |
| <50                          | 70 (13.2)      | 28 (11.0)                                        | 6 (10.0)                              | 31 (16.2)                                 | 5 (20.8)      |                      |
| 50-64                        | 218 (41.1)     | 108 (42.4)                                       | 31 (51.7)                             | 69 (36.1)                                 | 10 (41.7)     |                      |
| ≥65                          | 242 (45.7)     | 119 (46.7)                                       | 23 (38.3)                             | 91 (47.6)                                 | 9 (37.5)      |                      |
| Gender                       |                |                                                  |                                       |                                           |               | 0.08                 |
| Male                         | 386 (72.8)     | 194 (76.1)                                       | 48 (80.0)                             | 128 (67.0)                                | 16 (66.7)     |                      |
| Female                       | 144 (27.2)     | 61 (23.9)                                        | 12 (20.0)                             | 63 (33.0)                                 | 8 (33.3)      |                      |
| Race                         |                |                                                  |                                       |                                           |               | 0.43                 |
| White                        | 503 (95.8)     | 242 (95.7)                                       | 59 (100.0)                            | 180 (95.2)                                | 22 (91.7)     |                      |
| Black                        | 4 (0.8)        | 3 (1.2)                                          | 0 (0.0)                               | 1 (0.5)                                   | 0 (0.0)       |                      |
| Hispanic                     | 18 (3.4)       | 8 (3.2)                                          | 0 (0.0)                               | 8 (4.2)                                   | 2 (8.3)       |                      |
| Education                    |                |                                                  |                                       |                                           |               | 0.45                 |
| ≤High school                 | 191 (36.0)     | 100 (39.2)                                       | 18 (30.0)                             | 62 (32.5)                                 | 11 (45.8)     |                      |
| Some college                 | 157 (29.6)     | 69 (27.1)                                        | 17 (28.3)                             | 64 (33.5)                                 | 7 (29.2)      |                      |
| ≥College graduate            | 182 (34.3)     | 86 (33.7)                                        | 25 (41.7)                             | 65 (34.0)                                 | 6 (25.0)      |                      |
| Low Social Support           |                |                                                  |                                       |                                           |               | 0.99                 |
| No                           | 501 (94.5)     | 240 (94.1)                                       | 57(95.0)                              | 181 (94.8)                                | 23 (95.8)     |                      |
| Yes                          | 29 (5.5)       | 15 (5.9)                                         | 3 (5.0)                               | 10 (5.2)                                  | 1 (4.2)       |                      |
| Live Alone                   |                |                                                  |                                       |                                           |               | 0.86                 |
| No                           | 427 (80.6)     | 206 (80.8)                                       | 46 (76.7)                             | 156 (81.7)                                | 19 (79.2)     |                      |
| Yes                          | 103 (19.4)     | 49 (19.2)                                        | 14 (23.3)                             | 35 (18.3)                                 | 5 (20.8)      |                      |
| Low Health Literacy          |                |                                                  |                                       |                                           |               | 0.71                 |
| No                           | 379 (71.9)     | 182 (71.7)                                       | 39 (66.1)                             | 140 (73.7)                                | 18 (75.0)     |                      |
| Yes                          | 148 (28.1)     | 72 (28.3)                                        | 20 (33.9)                             | 50 (26.3)                                 | 6 (25.0)      |                      |
| Heavy Drinker                |                |                                                  |                                       |                                           |               | 0.88                 |
| No                           | 441 (90.9)     | 233 (91.4)                                       | 53 (88.3)                             | 174 (91.1)                                | 22 (91.7)     |                      |

|                                      |            |            |           |            |           |         |
|--------------------------------------|------------|------------|-----------|------------|-----------|---------|
| Yes                                  | 44 (9.1)   | 22 (8.6)   | 7 (11.7)  | 17 (8.9)   | 2 (8.3)   |         |
| Current Smoker                       |            |            |           |            |           | 0.03*   |
| No                                   | 432 (81.5) | 210 (82.4) | 51 (85.0) | 157 (82.2) | 14 (58.3) |         |
| Yes                                  | 98 (18.5)  | 45 (17.6)  | 9 (15.0)  | 34 (17.8)  | 10 (41.7) |         |
| Where to seek health care            |            |            |           |            |           | 0.15    |
| No places                            | 56 (10.6)  | 25 (9.9)   | 7 (11.7)  | 21 (11.1)  | 3 (12.5)  |         |
| Clinic or doctor office              | 426 (81.0) | 209 (82.9) | 47 (78.3) | 153 (80.5) | 17 (70.8) |         |
| Other places                         | 24 (4.6)   | 8 (3.2)    | 2 (3.3)   | 13 (6.8)   | 1 (4.2)   |         |
| Emergency department                 | 20 (3.8)   | 10 (4.0)   | 4 (6.7)   | 3 (1.6)    | 3 (12.5)  |         |
| ACS type                             |            |            |           |            |           | 0.005*  |
| STEMI                                | 123 (23.2) | 65 (25.5)  | 5 (8.3)   | 46 (24.1)  | 7 (29.2)  |         |
| NSTEMI                               | 314 (59.2) | 156 (61.2) | 37 (61.7) | 106 (55.5) | 15 (62.5) |         |
| Unstable angina                      | 93 (17.5)  | 34 (13.3)  | 18 (30.0) | 39 (20.4)  | 2 (8.3)   |         |
| History of PCI                       |            |            |           |            |           | 0.37    |
| No                                   | 422 (79.6) | 208 (81.6) | 47 (78.3) | 161 (79.1) | 16 (66.7) |         |
| Yes                                  | 108 (20.4) | 47 (18.4)  | 13 (21.7) | 40 (20.9)  | 8 (33.3)  |         |
| History of CABG                      |            |            |           |            |           | 0.64    |
| No                                   | 481 (90.8) | 231 (90.6) | 52 (86.7) | 176 (92.1) | 22 (91.7) |         |
| Yes                                  | 49 (9.2)   | 24 (9.4)   | 8 (13.3)  | 15 (7.9)   | 2 (8.3)   |         |
| Comorbidity <sup>a</sup> (mean [SD]) | 1.9 [1.6]  | 1.8 [1.6]  | 2.2 [1.8] | 1.9 [1.5]  | 2.5 [1.5] | 0.06    |
| Reporting generic pain               |            |            |           |            |           | <0.001* |
| No                                   | 145 (27.6) | 94 (37.2)  | 7 (11.7)  | 40 (21.2)  | 4 (16.7)  |         |
| mild to moderate                     | 299 (56.8) | 129 (51.0) | 41 (68.3) | 119 (63.0) | 10 (41.7) |         |
| severe                               | 82 (15.6)  | 30 (11.9)  | 12 (20.0) | 30 (15.9)  | 10 (41.7) |         |

Pain category was defined using pain self-reported for the first month after discharge from index hospitalization (using SF-36 survey distributed at one month post-discharge) and electronic health record (EHR) documentation of pain extracted by natural language processing from patient's clinical notes created within 30 days post discharge and before readmission to the hospital (if any). *TRACE-CORE* Transitions, Risks, and Actions in Coronary Events Center for Outcomes Research and Education, *STEMI* ST-segment elevation myocardial infarction, *NSTEMI* non-ST segment elevation myocardial infarction, *PCI* percutaneous coronary intervention, *CABG* coronary artery bypass graft, *SD*, standard deviation

<sup>a</sup>The number of diseases from the following 14 conditions in patient's medical history: atrial fibrillation, Alzheimer or dementia, anemia, cancer, congestive heart failure, chronic kidney disease, chronic lung disease, Type 2 diabetes, dialysis, hypertension, peripheral vascular disease, valvular heart disease, coronary heart disease or myocardial infarction, transient ischemic attack or stroke.

\* indicates statistically significant ( $P<0.05$ ).  $p$ -values were calculated by chi-square test (for categorical variables that have no cell size smaller than 5), Fisher's exact test (for categorical variables that have cell size smaller than 5), and analysis of variance (for comorbidity).

**Table S3-2. Association of self-reported pain status at one month with 30-day rehospitalization: TRACE-CORE, 2011-2013**

| Pain condition                  | Incidence of 30-day rehospitalization<br>n/N (%) | Model 1 <sup>a</sup> : Unadjusted |                | Model 2 <sup>b</sup> : Adjusted for baseline characteristics |                |
|---------------------------------|--------------------------------------------------|-----------------------------------|----------------|--------------------------------------------------------------|----------------|
|                                 |                                                  | OR (95% CI)                       | <i>P</i> value | OR (95% CI)                                                  | <i>P</i> value |
| <b>General pain by severity</b> |                                                  |                                   |                |                                                              |                |
| Reporting no pain               | 17/255 (6.7)                                     | Reference                         |                | Reference                                                    |                |
| Reporting mild to moderate pain | 23/251 (9.2)                                     | 1.41 (0.74-2.71)                  | 0.3            | 1.43 (0.73-2.82)                                             | 0.30           |
| Reporting severe pain           | 4/24 (16.7)                                      | 2.80 (0.86-9.12)                  | 0.09           | 2.55 (0.73-8.93)                                             | 0.14           |

Patient-self-reported pain status was collected for the first month after discharge from index hospitalization (using SF-36 survey distributed at one month post-discharge).

TRACE-CORE Transitions, Risks, and Actions in Coronary Events Center for Outcomes Research and Education

<sup>a</sup> Model 1: logistic regression, unadjusted for covariates.

<sup>b</sup> Model 2: multivariable logistic regression, adjusted for generic pain, smoking status, acute coronary syndrome type, and healthcare seeking behaviors reported at index hospitalization.

\* indicates statistically significant ( $P<0.05$ ).

**Table S3-3. Association of pain category (combining self-report with EHR data) with 30-day rehospitalization: TRACE-CORE, 2011-2013**

| Pain condition                                         | Incidence of 30-day rehospitalization | Model 1 <sup>a</sup> : Unadjusted |                | Model 2 <sup>b</sup> : Adjusted for baseline characteristics |                |
|--------------------------------------------------------|---------------------------------------|-----------------------------------|----------------|--------------------------------------------------------------|----------------|
|                                                        | n/N (%)                               | OR (95% CI)                       | <i>P</i> value | OR (95% CI)                                                  | <i>P</i> value |
| <b>Generic pain</b>                                    |                                       |                                   |                |                                                              |                |
| Reporting no pain                                      | 17/255 (6.7)                          | Reference                         |                | Reference                                                    |                |
| Reporting mild to moderate pain, documented in EHR     | 5/60 (8.3)                            | 1.27 (0.45-3.60)                  | 0.65           | 1.27 (0.43-3.74)                                             | 0.67           |
| Reporting mild to moderate pain, not documented in EHR | 18/191 (9.4)                          | 1.46 (0.73-2.91)                  | 0.29           | 1.48 (0.73-3.02)                                             | 0.28           |
| Reporting severe pain                                  | 4/24 (16.7)                           | 2.8 (0.86-9.12)                   | 0.09           | 2.54 (0.73-8.90)                                             | 0.14           |

Patient-self-reported pain status was collected for the first month after discharge from index hospitalization (using SF-36 survey distributed at one month post-discharge). Electronic health record (EHR) documentation of pain was extracted by natural language processing from patient’s clinical notes created within 30 days post discharge and before readmission to the hospital (if any).

TRACE-CORE indicates Transitions, Risks, and Actions in Coronary Events Center for Outcomes Research and Education

<sup>a</sup> Model 1: logistic regression, unadjusted for covariates.

<sup>b</sup> Model 2: multivariable logistic regression, adjusted for generic pain, smoking status, acute coronary syndrome type, and healthcare seeking behaviors reported at index hospitalization.

\* indicates statistically significant ( $P < 0.05$ ).
